# Supplementary material for: Isotropically etched radial micropore for cell concentration, immobilization, and picodroplet generation
Source: Royal Society of Chemistry journal article supplement (doi:10.1039/b817285d), 2009-01-01

Supplementary Material (ESI) for Lab on a Chip  
This journal is (C) The Royal Society of Chemistry 2009

## Supporting information

# Isotropically Etched Radial Micropore for Cell Concentration, Immobilization, and Picodroplet Generation

*Thomas D. Perroud, Robert J. Meagher, Michael P. Kanouff, Ronald F. Renzi, Meiye  
Wu, Anup K. Singh, and Kamlesh D. Patel\**

Sandia National Laboratories, PO Box 969, Livermore, CA 94551

\*To whom correspondence should be addressed. E-mail: [kdpatel@sandia.gov](mailto:kdpatel@sandia.gov). Fax: (925)  
294-3020.

S-1. Sequence of 38 images showing 38 different etched channels in a point-to-point configuration with decreasing mask distance.

S-2. Video of continuous-flow particle concentration ( $\Delta P = 13.8$  kPa,  $\delta P = 11.0$  kPa).

S-3. Empirical determination of  $R_i + R_o$  and  $R_p$ .

**S-1. Sequence of 38 images showing 38 different etched channels in a point-to-point**

**configuration with decreasing mask distance.** The 38 point-to-point 25- $\mu\text{m}$ -deep etched channels differ by a mask distance decreasing incrementally by 1 micron (67  $\mu\text{m}$  to 30  $\mu\text{m}$ ). These images were assembled into a movie sequence showing the presence of a micropore at a 50- $\mu\text{m}$  mask distance.

**S-2. Video of continuous-flow particle concentration ( $\Delta P = 13.8$  kPa,  $\delta P = 11.0$  kPa).**

(A) Entrance of concentrator where beads are far apart from each other and have fast velocities. (B) Exit of the concentrator where beads are closer to each other and have lower velocities.

**S-3. Empirical determination of  $R_i + R_o$  and  $R_p$ .** (A) Experimental data for the ratios of the inlet and outlet pressure differential  $\Delta P$  to the total flow rate  $\Sigma Q$  for a wide range of operating conditions; (B) Experimental data for the ratios of the sample and waste pressure differential  $\delta P$  to the transverse flow rate  $\delta Q$  for a wide range of operating conditions.

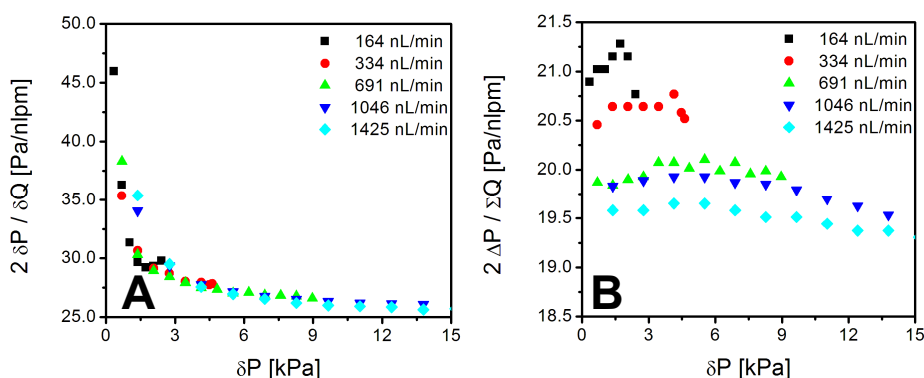

Supplement: b817285d.pdf [file b817285d.pdf]
